# Supplementary material for: Genome-wide identification of novel ovarian-predominant miRNAs: new insights from the medaka (Oryzias latipes)
Source: PubMed Central journal article supplement (PMC5223123; doi:10.1038/srep40241), 2017-01-10
Supplement: srep40241-s1.pdf [file srep40241-s1.pdf]

1 **Genome-wide identification of novel ovarian-predominant**  
2 **miRNAs: new insights from the medaka (*Oryzias latipes*)**

3 Amine Bouchareb, Aurélie Le Cam, Jérôme Montfort, Stéphanie Gay, Thaovi Nguyen, Julien

4 Bobe\*, Violette Thermes\*

5 LPGP, INRA, 35000 Rennes, France

6 \* Equal contribution

7 Correspondence to: Violette Thermes, [violette.thermes@inra.fr](mailto:violette.thermes@inra.fr)

8

9

10

11 **Supplemental Fig. S1:** Ovarian miRNAs over-abundance. Fold change of miRNA expression  
12 in ovary compared to the mean of other tissues or to the mean of testis.

13 **Supplemental Fig. S2:** Heterologous miRNA primer sequence.

14 **Supplemental Fig. S3:** Predicted miRNA hairpin structures.

15 **Supplemental Fig. S4:** Homologous miRNA primer sequences.

16 **Supplemental Fig. S5:** Generic vertebrate miRNAs 8x60K microarray design.

17 **Supplemental Fig. S6:** Predicted target genes for miR4785 and miR6352.

18

**Supplemental Fig. S1:** Ovarian miRNAs over-abundance. Fold change of miRNA expression in ovary compared to the mean of other tissues or to the mean of testis.

| Microarray probe | Fold-change ovary vs tissues | Fold-change ovary vs testis |
|------------------|------------------------------|-----------------------------|
| hsa-miR-4785     | 187.82                       | 134.21                      |
| mmu-miR-6352     | 59.88                        | 46.81                       |
| hsa-miR-1305     | 31.23                        | 26.91                       |
| hsa-miR-4713-3p  | 28.66                        | 25.15                       |
| hsa-miR-4716-3p  | 23.54                        | 20.02                       |
| rno-miR-202-3p   | 23.18                        | 19.7                        |
| mmu-miR-202-3p   | 21.97                        | 22.66                       |
| dre-miR-202-3p   | 11.13                        | 1.78                        |
| hsa-miR-6717-5p  | 22.28                        | 18.69                       |
| hsa-miR-5581-5p  | 21.97                        | 15.21                       |
| mmu-miR-697      | 21.3                         | 19.49                       |
| hsa-miR-3198     | 19.88                        | 16.85                       |
| hsa-miR-6131     | 19.7                         | 17.28                       |
| hsa-miR-4653-3p  | 18.99                        | 15.78                       |
| hsa-miR-487b-3p  | 15.11                        | 14.22                       |
| hsa-miR-5003-5p  | 15.11                        | 6.83                        |
| hsa-miR-1288-3p  | 15.03                        | 14.23                       |
| hsa-miR-3138     | 14.78                        | 13.99                       |
| hsa-miR-3125     | 13.17                        | 15.24                       |
| dre-miR-729      | 12.77                        | 10.74                       |
| rno-miR-743a-3p  | 12.63                        | 11.41                       |
| rno-miR-878      | 12.26                        | 11.31                       |
| hsa-miR-892b     | 11.89                        | 11.18                       |
| rno-miR-345-3p   | 11.73                        | 11.23                       |
| rno-miR-770-3p   | 11.55                        | 10.85                       |
| mmu-miR-878-3p   | 11.04                        | 10.34                       |
| rno-miR-3561-5p  | 9.59                         | 8.73                        |
| mmu-miR-1231-5p  | 9.52                         | 9.99                        |
| hsa-miR-500a-5p  | 9.48                         | 8.28                        |
| dre-miR-10d-3p   | 8.67                         | 7.39                        |
| rno-miR-150-3p   | 7.58                         | 8.43                        |
| hsa-miR-501-5p   | 7.11                         | 6.71                        |
| hsa-miR-6512-5p  | 6.96                         | 6.44                        |
| mmu-miR-3070-3p  | 6.95                         | 6.28                        |
| mmu-miR-3058-5p  | 6.74                         | 6.58                        |
| hsa-miR-1226-5p  | 6.67                         | 4.51                        |
| hsa-miR-3127-5p  | 6.58                         | 6.71                        |
| mmu-miR-3070-2   | 6.33                         | 5.07                        |
| rno-miR-3562     | 6.16                         | 4.4                         |
| mmu-miR-128-2    | 5.24                         | 5.87                        |
| rno-miR-547-3p   | 4.83                         | 4.79                        |
| hsa-miR-5194     | 4.54                         | 3.58                        |
| rno-miR-1912-3p  | 4.44                         | 4.28                        |
| mmu-miR-202-5p   | 4.11                         | 0.56                        |
| rno-miR-202-5p   | 1.59                         | 0.74                        |
| hsa-miR-575      | 4.02                         | 3.77                        |
| gga-miR-1577     | 4.01                         | 3.93                        |
| hsa-miR-6124     | 4                            | 6.32                        |
| ola-miR-187      | 3.93                         | 3.72                        |
| hsa-miR-4518     | 3.88                         | 3.8                         |
| mmu-miR-470-3p   | 3.75                         | 3.67                        |
| hsa-miR-1295a    | 3.55                         | 3.48                        |
| hsa-miR-320a     | 3.42                         | 3.84                        |
| mmu-miR-6412     | 3.38                         | 2.74                        |
| rno-miR-6326     | 3.25                         | 3.02                        |
| rno-miR-501-5p   | 2.91                         | 2.93                        |
| hsa-miR-4535     | 2.86                         | 2.8                         |
| hsa-miR-135a-3p  | 2.83                         | 2.01                        |
| mmu-miR-330-3p   | 2.79                         | 2.79                        |
| hsa-miR-4648     | 2.73                         | 2.73                        |
| dre-miR-31       | 2.67                         | 2.87                        |
| hsa-miR-513c-3p  | 2.65                         | 2.7                         |
| rno-miR-3065-3p  | 2.61                         | 2.59                        |
| hsa-miR-6134     | 2.58                         | 2.27                        |
| hsa-miR-4458     | 2.52                         | 2.66                        |
| hsa-miR-5196-5p  | 2.48                         | 2.22                        |
| hsa-miR-145-3p   | 2.43                         | 0.51                        |
| mmu-miR-1971     | 2.41                         | 2.09                        |
| mmu-miR-3104-5p  | 2.28                         | 2.01                        |
| mmu-miR-6405     | 2.25                         | 2.14                        |
| gga-miR-1466     | 2.18                         | 2.46                        |

**Supplemental Fig. S2:** Heterologous miRNA primer sequences.

| <b>miRNA</b>    | <b>Primer sequence</b>  |
|-----------------|-------------------------|
| dre-miR-202-3p  | AGAGGCAUAGGGCAUGGGAAAA  |
| dre-miR-29      | AUGGGUAUGAUACGACCUGGGUU |
| hsa-miR-1288-3p | UGGACUGCCCUGAUCUGGAGA   |
| hsa-miR-4653-3p | UGGAGUUAAGGGUUGCUUGGAGA |
| hsa-miR-4785    | AGAGUCGGCGACGCCGCCAGC   |
| hsa-miR-487b-3p | AAUCGUACAGGGUCAUCCACUU  |
| mmu-miR-6352    | UUUGGGAAAAGGACCCCAGCUC  |
| rno-miR-878     | GCAUGACACCAUACUGGGUAGA  |
| rno-miR-743a-3p | GAAAGACGCCAAACUGGGUAGA  |
| hsa-miR-1305-3p | UUUUCAACUCUAAUGGGAGAGA  |
| hsa-miR-4716-3p | AAGGGGAAGGAAACAUGGAGA   |
| hsa-miR-6131-3p | GGCUGGUCAGAUGGGAGUG     |
| dre-miR-10d-3p  | CAGAUUCGGUUUUAGGGGAGUA  |
| hsa-miR-6717-5p | AGGCGAUGUGGGGAUGUAGAGA  |
| rno-miR-345-3p  | CCCUGAACUAGGGGUCUGGAGA  |
| mmu-miR-697-3p  | AACAUCCUGGUCCUGUGGAGA   |
| hsa-miR-3198-3p | GUGGAGUCCUGGGGAAUGGAGA  |
| hsa-miR-4713-3p | UGGGAUCCAGACAGUGGGAGAA  |
| hsa-miR-5581-5p | AGCCUCCAGGAGAAAUGGAGA   |
| hsa-miR-892b-3p | CACUGGCUCUUUCUGGGUAGA   |

**Supplemental Fig. S3: Predicted miRNA hairpin structures.**

| miRNA name | Medaka genomic locus     | RNA Folding                                                                                                                                                                                                 | Lenght (nt) | MFE (-kcal/mol) |
|------------|--------------------------|-------------------------------------------------------------------------------------------------------------------------------------------------------------------------------------------------------------|-------------|-----------------|
| mir-6352a  | 9:31095668-31095687      | CAGGUUGGGGGUCAGGGAACAGGACCCAGCUAAAGGGAGUCUUCGGUUCUGUCAAAACCAGAGAACCAACAGCAGAAC<br>...((((((...((...(((.....))..))))))....))..)))))).....                                                                    | 80          | 21.80           |
| mir-4785a  | 16:16874299-16874318     | CCAGAGGAGUGCGAGCGUGGACACCGUGGAAGAAACACAGAGCUUCGGAGGAGCAUCAGUGACAUGAACCGAGUCUGCG<br>.....(((.....(((.....(((.....))))..))..))))..))))))..))))))<br>UCGCCGCCAGCAAAACCAU<br>))))..)).....                      | 80          | 24.40           |
| mir-4785b  | scaffold983:45388-45409  | CCCUCCGUUUUGAUCUGGGUGAGUCUCAGCACCAGCUCUUGGAGAGCAUCGACCAGCUCUUGUGAUCUCGGAGACGCC<br>..((((.....((((((((.....(((.....))))..))))..))))..))))..))))..))))..))))..))))<br>GCCAGCCCG<br>.....                      | 80          | 25              |
| mir-729    | scaffold1021:47363-47383 | CCCUCCAGAGCAGGGGCGUUAUCAUAACCAGGCGUGAGCUGAACGAGCAUGGGUAUGAUACGACCUCAGUU<br>.....(((.....(((.....(((.....(((.....))))..))..))))..))))..))))..))))..))))..))))                                                | 72          | 25.2            |
| mir-1288   | 1:27438143-27438162      | UGCAGUGAGGGCGGAAAACAGACAGGGUGUGGAUCAUAUGGAUAGCAAUGUUGGACAGCCUGAUGUGGAGCUUUGG<br>..(((.....((((.....(((.....))))..))))..))))..))))..))))..))))..))))..))))..))))                                             | 78          | 19.9            |
| mir-4716   | 7:23549695-23549716      | UGAUUACAGAAGUGUUUAAGGUUUCUCUAUGCGAAGAUGAGUGUUUGUGUUCUAUCUAUUGUGAACUGGGGGAAGCAAAC<br>.....((((((((.....((((((((((((.....))))..))))..))))..))))..))))..))))..))))..))))<br>AUGGAGAUUCUUUCAU<br>)).....))..... | 80          | 23.8            |
| mir-6717   | 19:8376541-8376561       | GACAUGGCGAUGGGGGGAUGCAGAGAGAGAUUUCUCUCUCCUCUCUUCUUGGCGCAUCACUGGG<br>...((((.....((((((((.....))))..))))..))))..))))..))))..))))..))))..))))..))))                                                           | 71          | 31.4            |
| mir-6131   | 12:21774089-21774108     | CAGGUAAAUGCAGGUCACCCUCAUCUUAACCCCAACAUGUAGA AACUGUUGCAUACUGGUGAGAUGGGAGUGGCUGGUGU<br>.....(((.....(((.....(((.....(((.....))))..))..))))..))))..))))..))))..))))..))))<br>AAC<br>...                        | 80          | 27.9            |
| mir-1305   | 16:14807294-14807314     | GAAGGUCUUCUGAUGAAACAAAUGUUCUGCUUUGUUUGGAAUUUUUAUUUUGAGCAAAGUACACAUCUUUUCACCUCUA<br>.....                                                                                                                    | 80          | 19.1            |



**Supplemental Fig. S4:** Homologous miRNA primer sequences.

| <b>miRNA</b>  | <b>Primer sequences</b> |
|---------------|-------------------------|
| miR-1288      | TGGACTGTCCTGATGTGGAGA   |
| miR-202-3p    | AGAGGCATAAGGCATGGGAA    |
| miR-4653      | GAGTTAAGGGTAGTTTGGAGA   |
| miR-4785a     | GAGTCTGCGTCGCCGCCAGC    |
| miR-4785b     | TGATCTCGGAGACGCCGCCAGC  |
| miR-487b      | GTCCCCTACAAGGTCATCCACTT |
| miR-6352a     | CAGGGAACAGGACCCAGCT     |
| miR-6352b     | AACTGGGAAAAGGACCCAG     |
| miR-729       | CATGGGTATGATACGACCTC    |
| miR-743aa     | GAAAGACGCCAAAGTGGGT     |
| miR-743ab     | GAAAGTCGCCAAACTGGGT     |
| miR-878       | GCATGACAACATACTGGGTA    |
| miR-6352-3    | TTTGGGAAAAAGATCCCAGCT   |
| miR-6352-4    | AAATGGGAAAAGCACCCAG     |
| miR-4785-3    | CGAGTCGGCGATGCCGCCGCC   |
| miR-878-2     | GCATGAAACCATACTGGGTC    |
| miR-1288-3p-2 | TGGACAGCCCTGATGTGGAG    |
| miR-4653-3p-2 | CTCTGTTAAGGGTTGCCTGGA   |
| miR-4653-3p-3 | AGAAAGTTGAGGGTTGCTTGG   |
| miR-729-3p-2  | CATGGGTATGAAACGACCCGGGT |
| miR-729-3p-3  | GGTATGATTCGGCCTGGGTT    |
| miR-487b-3p-2 | CGGCGTACAGGGTCATCCAC    |
| miR-1305-3p-1 | TTTTCAACTCTATTGGGAAA    |
| miR-1305-3p-2 | ATGTTCAACTCTAATGTGAGA   |
| miR-1305-3p-3 | TTTTCACCTCTAATGGGATAG   |
| miR-4716-3p   | CTGGGGGAAGCAAACATGGAGA  |
| miR-6131-3p-1 | CGCTGATCAGATGGGAGTCG    |
| miR-6131-3p-2 | ACTGGTGAGATGGGAGTGGC    |
| miR-10d-3p    | TACCCTGTAGAACCGAATGTGT  |
| miR-6717-5p-1 | GGCGATGGGGGGATGCAGAGA   |
| miR-6717-5p-2 | AAAGATGTGGGGATGTGGAGA   |
| miR-345-3p-1  | CCCTGAACTCGGGGTATGGA    |
| miR-345-3p-2  | CTGAACTAGGGTTCAGGAGA    |
| miR-697-3p-1  | AGCATCCTGTTCTGTGGAG     |
| miR-697-3p-2  | ACATCCTGGACCTGTGGA      |
| miR-3198-3p-1 | GTGGAGTCCTGAGGACTGGAG   |
| miR-3198-3p-2 | GTGGAGTCCTGCAGAATGGAG   |
| miR-4713-3p-1 | TGGGATCCAGACAGAGGGAGAA  |
| miR-4713-3p-2 | TGGGATGCAGAAAGTGGGAGAA  |
| miR-4713-3p-3 | AAAGATCCAGACAGTTGGAGA   |
| miR-5581-5p-1 | AGCCTTCCAGGAAAAATGGAG   |
| miR-5581-5p-2 | AGCCTTCCAGGAAAAATGGACA  |
| miR-892b-3p-1 | ACTGGGTCTTTCTGTGTAGA    |
| miR-892b-3p-2 | CACTGGCTCTTTCTGGGAA     |

**Supplemental Fig. S5:** Generic vertebrate miRNAs 8x60K microarray design.

| Rank | Species                          | # of miRNAs per species in miRBase V19 | # of miRNAs present on the array |
|------|----------------------------------|----------------------------------------|----------------------------------|
| 1    | <i>Oryzias latipes</i>           | 144 (304 probes)                       | 144                              |
| 2    | <i>Danio rerio</i>               | 245 (519 probes)                       | 228                              |
| 3    | <i>Fugu rubripes</i>             | 108 (224 probes)                       | 10                               |
| 4    | <i>Tetraodon nigroviridis</i>    | 109 (226 probes)                       | 3                                |
| 5    | <i>Cyprinus carpio</i>           | 146 (314 probes)                       | 68                               |
| 6    | <i>Hippoglossus hippoglossus</i> | 1 (3 probes)                           | 1                                |
| 7    | <i>Paralichthys olivaceus</i>    | 37 (82 probes)                         | 19                               |
| 8    | <i>Mus musculus</i>              | 1247 (3105 probes)                     | 1159                             |
| 9    | <i>Rattus norvegicus</i>         | 719 (1730 probes)                      | 374                              |
| 10   | <i>Xenopus tropicalis</i>        | 173 (369 probes)                       | 72                               |
| 11   | <i>Xenopus laevis</i>            | 21 (47 probes)                         | 2                                |
| 12   | <i>Homo sapiens</i>              | 2006 (4774 probes)                     | 1665                             |
| 13   | <i>Gallus gallus</i>             | 789 (1662 probes)                      | 55                               |

**Supplemental Fig. S6:** Predicted target genes for miR-4785 and miR-6352.

| MIR4785         |          | MIR6352            |               |
|-----------------|----------|--------------------|---------------|
| ENSG00000244045 | TMEM199  | ENSMUSG00000020495 | Smg8          |
| ENSG00000196152 | ZNF79    | ENSMUSG00000036854 | Hspb6         |
| ENSG00000174521 | TTC9B    | ENSMUSG00000013353 | 4931406B18Rik |
| ENSG00000141574 | SECTM1   | ENSMUSG00000033943 | Mga           |
| ENSG00000167670 | CHAF1A   | ENSMUSG00000043832 | Clec4a3       |
| ENSG00000197483 | ZNF628   | ENSMUSG00000050558 | Prokr2        |
| ENSG00000205927 | OLIG2    | ENSMUSG00000089774 | Slc5a3        |
| ENSG00000125788 | DEFB126  | ENSMUSG00000074365 | Crxos         |
| ENSG00000112679 | DUSP22   | ENSMUSG00000070695 | Cntnap5a      |
| ENSG00000170820 | FSHR     | ENSMUSG00000038893 | Fam117a       |
| ENSG00000179133 | C10orf67 | ENSMUSG00000027905 | Ddx20         |
|                 |          | ENSMUSG00000032097 | Ddx6          |
|                 |          | ENSMUSG00000035456 | Prdm8         |
|                 |          | ENSMUSG00000094958 | 3110021N24Rik |
|                 |          | ENSMUSG00000059060 | Rad51b        |
|                 |          | ENSMUSG00000062157 | Ifnlr1        |
|                 |          | ENSMUSG00000020463 | Smek2         |

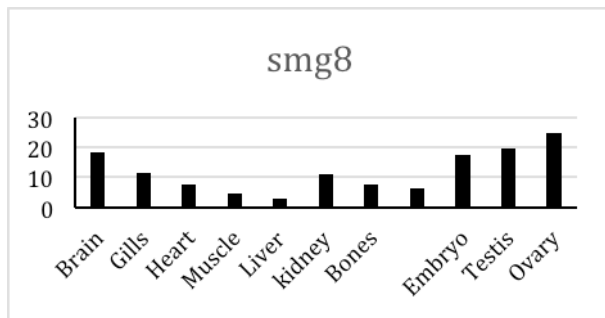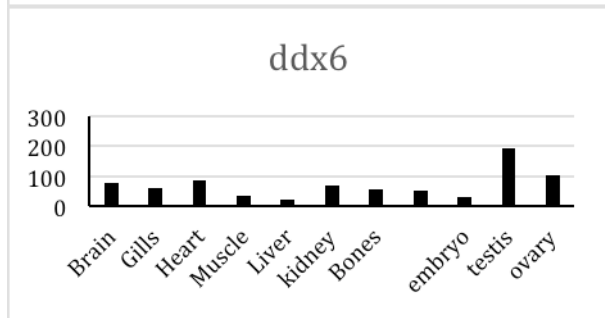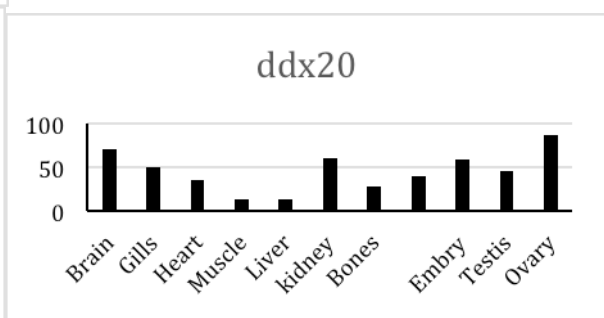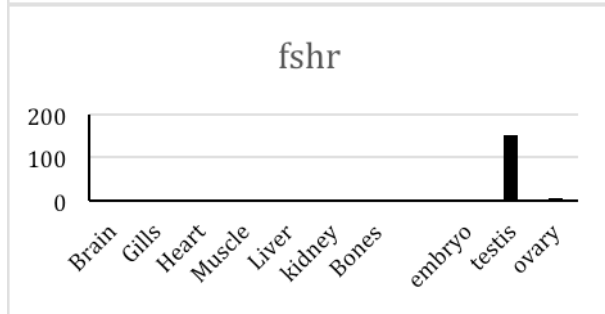



| smg8      |       |
|-----------|-------|
| Tissue    | Mean  |
| Brain     | 18,41 |
| Gills     | 11,34 |
| Heart     | 7,78  |
| Muscle    | 4,58  |
| Liver     | 2,67  |
| kidney    | 11,11 |
| Bones     | 7,48  |
| Intestine | 6,3   |
| Embryo    | 17,54 |
| Testis    | 19,82 |
| Ovary     | 24,61 |

| ddx20     |       |
|-----------|-------|
| Tissue    | Mean  |
| Brain     | 70,12 |
| Gills     | 50,84 |
| Heart     | 36,43 |
| Muscle    | 14,18 |
| Liver     | 13,17 |
| kidney    | 60,17 |
| Bones     | 27,99 |
| Intestine | 39,86 |
| Embryo    | 59,39 |
| Testis    | 46,48 |
| Ovary     | 86,35 |

| ddx6      |        |
|-----------|--------|
| Tissue    | Mean   |
| Brain     | 75,73  |
| Gills     | 60,96  |
| Heart     | 84,43  |
| Muscle    | 33,29  |
| Liver     | 22,5   |
| kidney    | 69,73  |
| Bones     | 56,84  |
| Intestine | 49,37  |
| embryo    | 30,54  |
| testis    | 191,66 |
| ovary     | 102,45 |

| fshr      |       |
|-----------|-------|
| Tissue    | Mean  |
| Brain     | 2,18  |
| Gills     | 0,06  |
| Heart     | 0,25  |
| Muscle    | 0     |
| Liver     | 0     |
| kidney    | 0,06  |
| Bones     | 0,06  |
| Intestine | 0     |
| embryo    | 0     |
| testis    | 153,2 |
| ovary     | 5,39  |
